# Supplementary material
Source: PubMed Central journal article supplement (PMC3104124)
Supplement: NIHMS288279-supplement-01.pdf [file NIHMS288279-supplement-01.pdf]

## Supplementary Materials

**Supplementary Table 1.** PCR mutagenesis of Ste2p extracellular regions

| <b>Region of interest</b> | <b>Primer pair for mutagenesis</b> | <b>Mutagenized region of <i>STE2</i> (nucleotide no.)<sup>a</sup></b> | <b>Mutagenized region of <i>STE2</i> (amino acid no. )</b> | <b>Plasmid vector for homologous recombination</b> | <b>Restriction site used for linearization</b> |
|---------------------------|------------------------------------|-----------------------------------------------------------------------|------------------------------------------------------------|----------------------------------------------------|------------------------------------------------|
| N-terminal                | ON403/ON668                        | -148 - 237                                                            | M1 - P79                                                   | pMD1349                                            | <i>HpaI</i>                                    |
| EC1                       | ON864/ON947                        | 238 - 477                                                             | I80 - F159                                                 | pMD1450                                            | <i>XbaI</i>                                    |
| EC2                       | ON948/ON949                        | 492 - 696                                                             | M165 - S232                                                | pMD1230                                            | <i>NheI</i>                                    |
| EC3                       | ON868/ON869                        | 736 - 897                                                             | I246 - A299                                                | pMD1230                                            | <i>KpnI</i>                                    |

<sup>a</sup>Nucleotides are numbered from the first position of the initiation codon

**Supplementary Table 2:** Sequences of clones initially recovered from the N-terminal, EC1, EC2, and EC3 libraries

| Library           | Clone name | Mutations <sup>a</sup>                         |
|-------------------|------------|------------------------------------------------|
| <b>N-Terminal</b> | NR1        | F12L, S34T                                     |
|                   | NR2        | T16S, Q51R                                     |
|                   | NR3        | I53F                                           |
|                   | NR4        | WT ( <u>S22S</u> )                             |
|                   | NR5        | T27S, L44F                                     |
|                   | NR6        | S47R                                           |
|                   | NR7        | S47R                                           |
|                   | NR8        | N46I                                           |
|                   | NR9        | S34F, T35S, Q51L, <u>A63A</u>                  |
|                   | NR10       | WT                                             |
|                   | NR11       | <u>N32N</u> , F55S                             |
|                   | NR12       | V49A, Q51H                                     |
|                   | NS1        | Q51K, T65A                                     |
|                   | NS2        | WT                                             |
|                   | NS3        | Q51K, T65A                                     |
|                   | NS4        | Q51K, T65A                                     |
|                   | NS5        | T37S, Q51R                                     |
|                   | NS6        | V49A, Q51H                                     |
|                   | NS7        | Q51H, <u>G60G</u>                              |
|                   | NS8        | S9C, T48S, Q51H                                |
|                   | NS9        | Q51H                                           |
|                   | NS10       | <u>G31G</u> , <u>T50T</u> , Q51H, I53F         |
|                   | NS11       | V49A, Q51H                                     |
| NS12              | Q51K, T65A |                                                |
| <b>EC1</b>        | 2SEC101    | V86L, F116L, Y128H, I133V, V139A, <u>I142I</u> |
|                   | 2SEC102    | F99L, P117S                                    |
|                   | 2SEC103    | D124G, L137P                                   |
|                   | 2SEC104    | L93STOP, L113P, R122S, <u>S145S</u>            |
|                   | 2SEC105    | L102S, V136A, <u>A140A</u>                     |
|                   | 2SEC106    | I192T, Y101C, F119V                            |
|                   | 2SEC107    | F99L, <u>V125V</u> , I134S                     |
|                   | 2SEC108    | Y98N, K100N, L103Q, S108P, <u>A112A</u>        |
|                   | 2SEC109    | <u>A96A</u> , F99L, <u>S107S</u>               |
|                   | 2SEC110    | Y101C, <u>I134I</u>                            |
|                   | 2SEC111    | Y98C, Y101C                                    |
|                   | 2SEC112    | <u>A96A</u> , F99I                             |
|                   | 2SEC114    | F99L                                           |
|                   | 2SEC115    | <u>A96A</u> , F99L, <u>S107S</u>               |
|                   | 2SEC116    | F99S                                           |
|                   | 2SEC117    | Y98C, Y101C                                    |
|                   | 2SEC118    | F99L                                           |
|                   | 2SEC119    | <u>I91I</u> , Y101C, F148S                     |
|                   | 2SEC120    | Y98C, Y101C                                    |
|                   | ECL104S    | L113P                                          |
| ECL106S           | Y128H      |                                                |
| <b>EC2</b>        | 2SEC201    | N194S, D195G, S197G, T208S, I209F              |
|                   | 2SEC202    | V196D, N205D, S207G                            |
|                   | 2SEC203    | <u>L211L</u> , F220I                           |

|            |         |                                                                |
|------------|---------|----------------------------------------------------------------|
|            | 2SEC204 | I190N, D201V, Y203F, S207G, I209V, <u>S214S</u> , <u>S219S</u> |
|            | 2SEC205 | WT                                                             |
|            | 2SEC206 | G188S, D195V, <u>A198A</u> , T208A                             |
|            | 2SEC207 | WT                                                             |
|            | 2SEC208 | V178D, <u>V183V</u>                                            |
|            | 2SEC209 | WT ( <u>V178V</u> , <u>V196V</u> )                             |
|            | 2SEC210 | T199A, T208A, <u>A212A</u>                                     |
|            | 2SEC211 | S214T                                                          |
|            | 2SEC212 | I215T, M218T                                                   |
|            | 2SEC213 | I175S, V178G, <u>T192T</u> , K202R                             |
|            | 2SEC214 | I190N, D201V, Y203F, S207G, I209V, <u>S214S</u> , <u>S219S</u> |
|            | 2SEC215 | I227V                                                          |
|            | 2SEC216 | WT                                                             |
|            | 2SEC217 | <u>V186V</u> , D201Y, F204I, S207G, M218T                      |
|            | 2SEC218 | S207I                                                          |
|            | 2SEC219 | N205H                                                          |
|            | 2SEC220 | N205Y                                                          |
|            | ECL202S | Q200L, F204L, T208A, I215M                                     |
|            | ECL204S | Q200L, F204L, T208A, I215M                                     |
|            | ECL205S | F204L                                                          |
|            | ECL206S | V178A, N205D                                                   |
|            |         |                                                                |
| <b>EC3</b> | EC3-1R  | D275E, <u>V280V</u>                                            |
|            | EC3-2R  | F262Y, <u>P270P</u> , D275E, T282S                             |
|            | EC3-3R  | I260L, F262Y, I2632V, D275G                                    |
|            | EC3-4R  | D275E, T278A                                                   |
|            | EC3-5R  | G273S, <u>T279T</u> , <u>V280V</u> , <u>A281A</u>              |
|            | EC3-6R  | G273S, <u>L291L</u>                                            |
|            | EC3-7R  | G273S                                                          |
|            | EC3-8R  | D275E, <u>V280V</u> , A281T                                    |
|            | EC3-9R  | K269N, G273S                                                   |
|            | EC3-10R | D275E                                                          |
|            | EC3-11R | L277S, W295*                                                   |
|            | EC3-12R | <u>S259S</u> , I263S, T274I, <u>L289L</u>                      |
|            | EC3-13S | <u>V257V</u> , S267C, D275G                                    |
|            | EC3-14S | Q272R, D275E, <u>A281A</u> , <u>A285A</u>                      |
|            | EC3-15S | <u>G273G</u> , D275E                                           |
|            | EC3-16S | D275E                                                          |
|            | EC3-17S | <u>G273G</u> , D275E                                           |
|            | EC3-18S | <u>T274T</u> , D275E                                           |
|            | EC3-19S | Q272P, T278A, <u>V280V</u> , <u>L287L</u> , <u>S293S</u>       |
|            | EC3-20S | D275E                                                          |
|            | EC3-21S | T274S, D275E, L277P                                            |
|            | EC3-22S | D275E                                                          |
|            | EC3-23S | K269R, D275E                                                   |
|            | EC3-24S | WT                                                             |

<sup>a</sup> Underlined mutations are translationally silent

**Supplementary Table 3.** Effects of receptor mutations that alter the emission spectrum of [Lys<sup>7</sup>(NBD),Nle<sup>12</sup>] agonist on the binding and emission spectrum of the antagonist dTyr<sup>3</sup>[Lys<sup>7</sup>(NBD),Nle<sup>12</sup>]  $\alpha$ -factor.

| Mutation  | Rel. B <sub>max</sub><br>Ratio <sup>a</sup><br>(FL1/FL2) | FL1                              |                                    | Rel. Constitutive<br>Activity |
|-----------|----------------------------------------------------------|----------------------------------|------------------------------------|-------------------------------|
|           |                                                          | Rel. K <sub>d</sub> <sup>b</sup> | Rel. B <sub>max</sub> <sup>c</sup> |                               |
| <b>WT</b> | <b>0.3<sup>a</sup></b>                                   | <b>1.0</b>                       | <b>100</b>                         | <b>1.0</b>                    |
| L44F      | 0.3 ± 0.03                                               | 1.0 ± 0.02                       | 228 ± 13                           | 1.1 ± 0.1                     |
| Q51H      | 0.3 ± 0.01                                               | 1.3 ± 0.1                        | 85 ± 3                             | 1.2 ± 0.2                     |
| F55S      | No detectable binding                                    |                                  |                                    | 1.3 ± 0.2                     |
| Y101C     | 0.3 ± 0.03                                               | 0.7 ± 0.1                        | 155 ± 11                           | 1.5 ± 0.2                     |
| Y128H     | 0.4 ± 0.1                                                | 3.5 ± 1.5                        | 9 ± 2                              | 1.7 ± 0.3                     |
| F204I     | 0.3 ± 0.04                                               | 1.5 ± 0.03                       | 41 ± 4                             | 0.8 ± 0.1                     |
| F204L     | 0.3 ± 0.06                                               | 1.0 ± 0.4                        | 51 ± 7                             | 0.9 ± 0.1                     |
| Y266C     | 0.3 ± 0.04                                               | 1.1 ± 0.2                        | 55 ± 5                             | 0.9 ± 0.2                     |
| D275E     | 0.3 ± 0.03                                               | 0.8 ± 0.1                        | 102 ± 6                            | 1.5 ± 0.5                     |

<sup>a</sup> the reported ratio is normalized to that of agonist [Lys<sup>7</sup>(NBD),Nle<sup>12</sup>] $\alpha$ -factor binding to normal receptors. (Note that all other results in this table are normalized to the values of normal receptor interacting with antagonist [dTyr<sup>3</sup>,Lys<sup>7</sup>(NBD),Nle<sup>12</sup>] $\alpha$ -factor.)

<sup>b</sup> computed as the ratio K<sub>d</sub>(mutant)/K<sub>d</sub>(wild type) (for [dTyr<sup>3</sup>,Lys<sup>7</sup>(NBD),Nle<sup>12</sup>] $\alpha$ -factor)

<sup>c</sup> computed as 100× B<sub>max</sub>(mutant)/B<sub>max</sub>(wild type) (for [dTyr<sup>3</sup>,Lys<sup>7</sup>(NBD),Nle<sup>12</sup>] $\alpha$ -factor)

**Supplementary Table 4.** Binding of the agonist [Lys<sup>7</sup>(NBD),Nle<sup>12</sup>] $\alpha$ -factor to  $\alpha$ -factor receptor mutants exhibiting altered spectra of bound antagonist.

| Mutation | Rel. B <sub>max</sub><br>Ratio<br>(FL1/FL2) | FL1                              |                                    |
|----------|---------------------------------------------|----------------------------------|------------------------------------|
|          |                                             | Rel. K <sub>d</sub> <sup>a</sup> | Rel. B <sub>max</sub> <sup>b</sup> |
| WT       | 1.0                                         | 1.0                              | 100                                |
| M54I     | 0.9 ± 0.1                                   | 0.7 ± 0.2                        | 94 ± 7                             |
| F55L     | 0.9 ± 0.1                                   | 0.7 ± 0.2                        | 47 ± 4                             |
| M218K    | 0.9 ± 0.04                                  | 0.3 ± 0.03                       | 43 ± 1                             |
| L222R    | 1.0 ± 0.1                                   | 0.5 ± 0.1                        | 47 ± 3                             |
| Q253L    | 1.0 ± 0.1                                   | 0.8 ± 0.2                        | 82 ± 7                             |
| P258L    | 1.0 ± 0.1                                   | 1.5 ± 0.3                        | 66 ± 4                             |
| P258S    | 1.1 ± 0.1                                   | 0.3 ± 0.1                        | 20 ± 1                             |
| P258T    | 1.0 ± 0.1                                   | 0.7 ± 0.2                        | 56 ± 2                             |

<sup>a</sup> computed as the ratio K<sub>d</sub>(mutant)/K<sub>d</sub>(wild type) (for [Lys<sup>7</sup>(NBD),Nle<sup>12</sup>] $\alpha$ -factor)

<sup>b</sup> computed as 100× B<sub>max</sub>(mutant)/B<sub>max</sub>(wild type) (for [Lys<sup>7</sup>(NBD),Nle<sup>12</sup>] $\alpha$ -factor)

**Supplementary Table 5.** Yeast strains.

| <b>Strain</b> | <b>Plasmid</b> | <b>STE2 allele</b>                 | <b>Mutagenic Oligonucleotide<sup>a</sup></b> | <b>Original plasmid vector</b> |
|---------------|----------------|------------------------------------|----------------------------------------------|--------------------------------|
| A1239         | pMD228         | <i>ste2-Δ</i>                      | -                                            | pMD228                         |
| A3694         | pMD1230        | Truncated <i>STE2</i> <sup>+</sup> | -                                            | pMD1230                        |
| A3785         | pMD1623        | F12L                               | ON1183                                       | pMD1230                        |
| A3822         | pMD1644        | T27S                               | ON1191                                       | pMD1230                        |
| A3786         | pMD1624        | S34F                               | ON1184                                       | pMD1230                        |
| A3823         | pMD1645        | S34T                               | ON1192                                       | pMD1230                        |
| A3787         | pMD1625        | T35S                               | ON1185                                       | pMD1230                        |
| A3824         | pMD1646        | L44F                               | ON1193                                       | pMD1230                        |
| A3716         | pMD1609        | N46I                               | -                                            | pMD1349                        |
| A3655         | pMD1594        | S47R                               | -                                            | pMD1349                        |
| A3401         | pMD1446        | V49A                               | ON1056                                       | pMD1230                        |
| A3825         | pMD1647        | V49S                               | ON1194                                       | pMD1230                        |
| A3826         | pMD1648        | T50F                               | ON1195                                       | pMD1230                        |
| A3405         | pMD1441        | Q51H                               | ON1051                                       | pMD1230                        |
| A3827         | pMD1649        | A52S                               | ON1196                                       | pMD1230                        |
| A3654         | pMD1593        | I53F                               | -                                            | pMD1349                        |
| A3828         | pMD1650        | M54S                               | ON1197                                       | pMD1230                        |
| A3788         | pMD1626        | F55S                               | ON1182                                       | pMD1230                        |
| A3402         | pMD1447        | T65A                               | ON1057                                       | pMD1230                        |
| A3722         | pMD1615        | Y98C                               | ON1112                                       | pMD1230                        |
| A3452         | pMD1462        | F99I                               | -                                            | pMD1450                        |
| A3434         | pMD1460        | F99L                               | -                                            | pMD1450                        |
| A3453         | pMD1463        | F99S                               | -                                            | pMD1450                        |
| A3435         | pMD1461        | Y101C                              | -                                            | pMD1450                        |
| A3789         | pMD1627        | L102S                              | ON1154                                       | pMD1230                        |
| A3432         | pMD1464        | L113P                              | -                                            | pMD1450                        |
| A3724         | pMD1617        | D124G                              | ON1150                                       | pMD1230                        |
| A3433         | pMD1465        | Y128H                              | -                                            | pMD1450                        |
| A3725         | pMD1618        | V136A                              | ON1163                                       | pMD1230                        |
| A3790         | pMD1628        | L137P                              | ON1155                                       | pMD1230                        |
| A3791         | pMD1629        | V178A                              | ON1091                                       | pMD1230                        |
| A3438         | pMD1467        | V178D                              | -                                            | pMD1230                        |
| A3792         | pMD1630        | V178G                              | ON1092                                       | pMD1230                        |
| A3793         | pMD1631        | F204I                              | ON1186                                       | pMD1230                        |
| A3436         | pMD1473        | F204L                              | -                                            | pMD1230                        |
| A3673         | pMD1605        | N205D                              | ON1114                                       | pMD1230                        |
| A3447         | pMD1471        | N205H                              | -                                            | pMD1230                        |
| A3448         | pMD1472        | N205Y                              | -                                            | pMD1230                        |
| A3674         | pMD1606        | S207G                              | ON1115                                       | pMD1230                        |
| A3449         | pMD1470        | S207I                              | -                                            | pMD1230                        |
| A3675         | pMD1607        | T208A                              | ON1116                                       | pMD1230                        |
| A3450         | pMD1468        | S214T                              | -                                            | pMD1230                        |
| A3794         | pMD1632        | I215M                              | ON1187                                       | pMD1230                        |
| A3795         | pMD1633        | I215T                              | ON1153                                       | pMD1230                        |

|       |         |       |        |         |
|-------|---------|-------|--------|---------|
| A3796 | pMD1634 | M218T | ON1158 | pMD1230 |
| A3437 | pMD1466 | F220I | -      | pMD1230 |
| A3451 | pMD1469 | I227V | -      | pMD1230 |
| A3798 | pMD1636 | I263S | ON1189 | pMD1230 |
| A3805 | pMD1643 | Y266C | ON51   | pMD1230 |
| A3829 | pMD1654 | L268S | ON1200 | pMD1230 |
| A3832 | pMD1655 | K269A | ON846  | pMD1230 |
| A3830 | pMD1652 | P270S | ON1199 | pMD1230 |
| A3800 | pMD1638 | Q272P | ON1159 | pMD1230 |
| A3659 | pMD1596 | G273S | -      | pMD1230 |
| A3801 | pMD1639 | T274I | ON1161 | pMD1230 |
| A3833 | pMD1656 | D275A | ON467  | pMD1230 |
| A3660 | pMD1597 | D275E | -      | pMD1230 |
| A3802 | pMD1640 | D275G | ON1151 | pMD1230 |
| A3803 | pMD1641 | L277S | ON1156 | pMD1230 |
| A3804 | pMD1642 | T278A | ON1162 | pMD1230 |

<sup>a</sup>Sequences of oligonucleotides are available upon request.

**Supplementary Table 6.** Binding of the antagonist [desTrp<sup>1</sup>,Ala<sup>3</sup>,Lys<sup>7</sup>(NBD),Nle<sup>12</sup>]α-factor to selected α-factor receptor mutants that alter the emission spectrum of receptor-bound [DTyr<sup>3</sup>,Lys<sup>7</sup>(NBD),Nle<sup>12</sup>]α-factor.

| Mutation | Rel. B <sub>max</sub><br>Ratio <sup>a</sup><br>(FL1/FL2) | FL1                              |                                    |
|----------|----------------------------------------------------------|----------------------------------|------------------------------------|
|          |                                                          | Rel. K <sub>d</sub> <sup>b</sup> | Rel. B <sub>max</sub> <sup>c</sup> |
| WT       | 0.5 <sup>a</sup>                                         | 1.0                              | 100                                |
| M218K    | 1.1 ± 0.1                                                | 0.2 ± 0.02                       | 170 ± 8                            |
| Q253L    | 1.2 ± 0.1                                                | 0.3 ± 0.1                        | 234 ± 13                           |
| P258S    | 1.3 ± 0.1                                                | 0.2 ± 0.03                       | 112 ± 5                            |

<sup>a</sup> The reported ratio is normalized to that of agonist [Lys<sup>7</sup>(NBD),Nle<sup>12</sup>]α-factor binding to normal receptors. Note that all other results in this table are normalized to the values of normal receptor interacting with desTrp<sup>1</sup>,Ala<sup>3</sup>,Lys<sup>7</sup>(NBD),Nle<sup>12</sup>]α-factor

<sup>b</sup> computed as the ratio K<sub>d</sub>(mutant)/K<sub>d</sub>(wild type) (for [desTrp<sup>1</sup>,Ala<sup>3</sup>,Lys<sup>7</sup>(NBD),Nle<sup>12</sup>]α-factor). The absolute value of the K<sub>d</sub> for [desTrp<sup>1</sup>,Ala<sup>3</sup>,Lys<sup>7</sup>(NBD),Nle<sup>12</sup>]α-factor was 37 ± 5 nM (n = 1 triplicate assay)

<sup>c</sup> computed as 100 × B<sub>max</sub>(mutant)/B<sub>max</sub>(wild type) (for [desTrp<sup>1</sup>,Ala<sup>3</sup>,Lys<sup>7</sup>(NBD),Nle<sup>12</sup>]α-factor)



## Supplementary Text

### Analytical treatment of receptor activation according to the two-state model.

We follow the formalism for describing the equilibrium between activated and un-activated states of ligand-bound and ligand-free receptor under conditions where the ligand-free and ligand-bound receptors activate downstream responses with equal efficiency <sup>1</sup>:

$$\text{Signaling Response} = a [ R_T ] \frac{\frac{\alpha K_L + [L]}{1 + \alpha K_R}}{\frac{\alpha K_L (1 + K_R)}{1 + \alpha K_R} + [L]}$$

where  $a$  is a proportionality constant,  $[R_T]$  is the total concentration of receptors,  $[L]$  is the ligand concentration,  $K_L$  is the dissociation constant for ligand binding to un-activated receptors,  $K_R$  is the equilibrium constant for the de-activation of ligand-free receptor, and  $\alpha$  is the ratio of dissociation constants for ligand binding to activated vs. un-activated receptors.

For a neutral antagonist,  $\alpha = 1$ ; the ligand binds with equal affinity to the activated and un-activated states and the expression reduces to:

$$\text{Signaling Response} = a [ R_T ] \frac{1}{1 + K_R}$$

In this situation, the response is independent of ligand concentration under all conditions, so that modifications of  $K_R$  leading to enhanced constitutive activation of the receptor can not be responsible for inducing ligand-dependent signaling.

At saturating ligand concentrations ( $[L] \gg K_L$ ) and, considering weakly activating ligands, such as the  $\alpha$ -factor antagonists/partial agonists, such that  $\alpha \approx 1$

$$\text{Signaling Response} = a [ R_T ] \frac{1}{(1 + \alpha K_R)}$$

In the absence of ligand ( $[L] = 0$ ) the expression again reduces to:

$$\text{Signaling Response} = a [ R_T ] \frac{1}{1 + K_R}$$

Thus, both ligand-independent and maximal ligand-dependent signaling will increase as the equilibrium shifts toward the activated state of the receptor, decreasing the equilibrium constant  $K_R$ . This formalism predicts that for weakly activating ligands, such as the  $\alpha$ -factor antagonists/partial agonists (for which  $\alpha \approx 1$ ), the percentage increase in maximal ligand-dependent signaling resulting from a change in  $K_R$  should be approximately equal to the percentage increase in the level of constitutive signaling. This is observed for certain of the stronger mutations recovered from the antagonist screen, such as Q253L and P258S, however, it is not observed for other mutations, such as M218K and L222R (Supplementary Fig. 6), suggesting either that the latter substitutions may do more than simply alter the equilibrium constant  $K_R$  for activation or that these effects occur via mechanisms outside the context of the two-state model.

## References

1. Taylor, P., Insel P.A. (1990). The Molecular Basis of Pharmacological Selectivity. In *Principles of Drug Action: The Basis of Pharmacology* (Pratt, W. B. a. T., P., ed.). Churchill Livingstone Inc., New York, NY.

**Supplementary Fig. 1:** Emission spectra of three different NBD-a-factor analogs in environments of different polarity. Panels a and b - 50 nM [Lys<sup>7</sup>(NBD),Nle<sup>12</sup>] a-factor. Panels c and d - 50 nM [Dap<sup>3</sup>(NBD),Arg<sup>7</sup>,Nle<sup>12</sup>] a-factor. Panels e and f - 50 nM [DTyr<sup>3</sup>,Lys<sup>7</sup>(NBD),Nle<sup>12</sup>] a-factor. The Unbroken (—) lines represent spectra in 98% 2-propanol and the broken (---) ones in 20 mM sodium acetate buffer (pH 4.6). In panels a), c), and e) the spectra have been normalized to the same peak emission intensity. Panels b), d), and f) show the same spectra without normalization. The ranges of the flow cytometer channels FL1 (515 - 545 nm) and FL2 (565 - 605 nm) are represented by the shaded rectangles. The fluorimeter used was a Horiba Jobin Yvon FluoroMax4. The fluorescent a-factor was excited at 488 nm and emission was recorded between 500 and 700 nm. A slit width of 5 nm and an integration time of 1 second/nm were used.

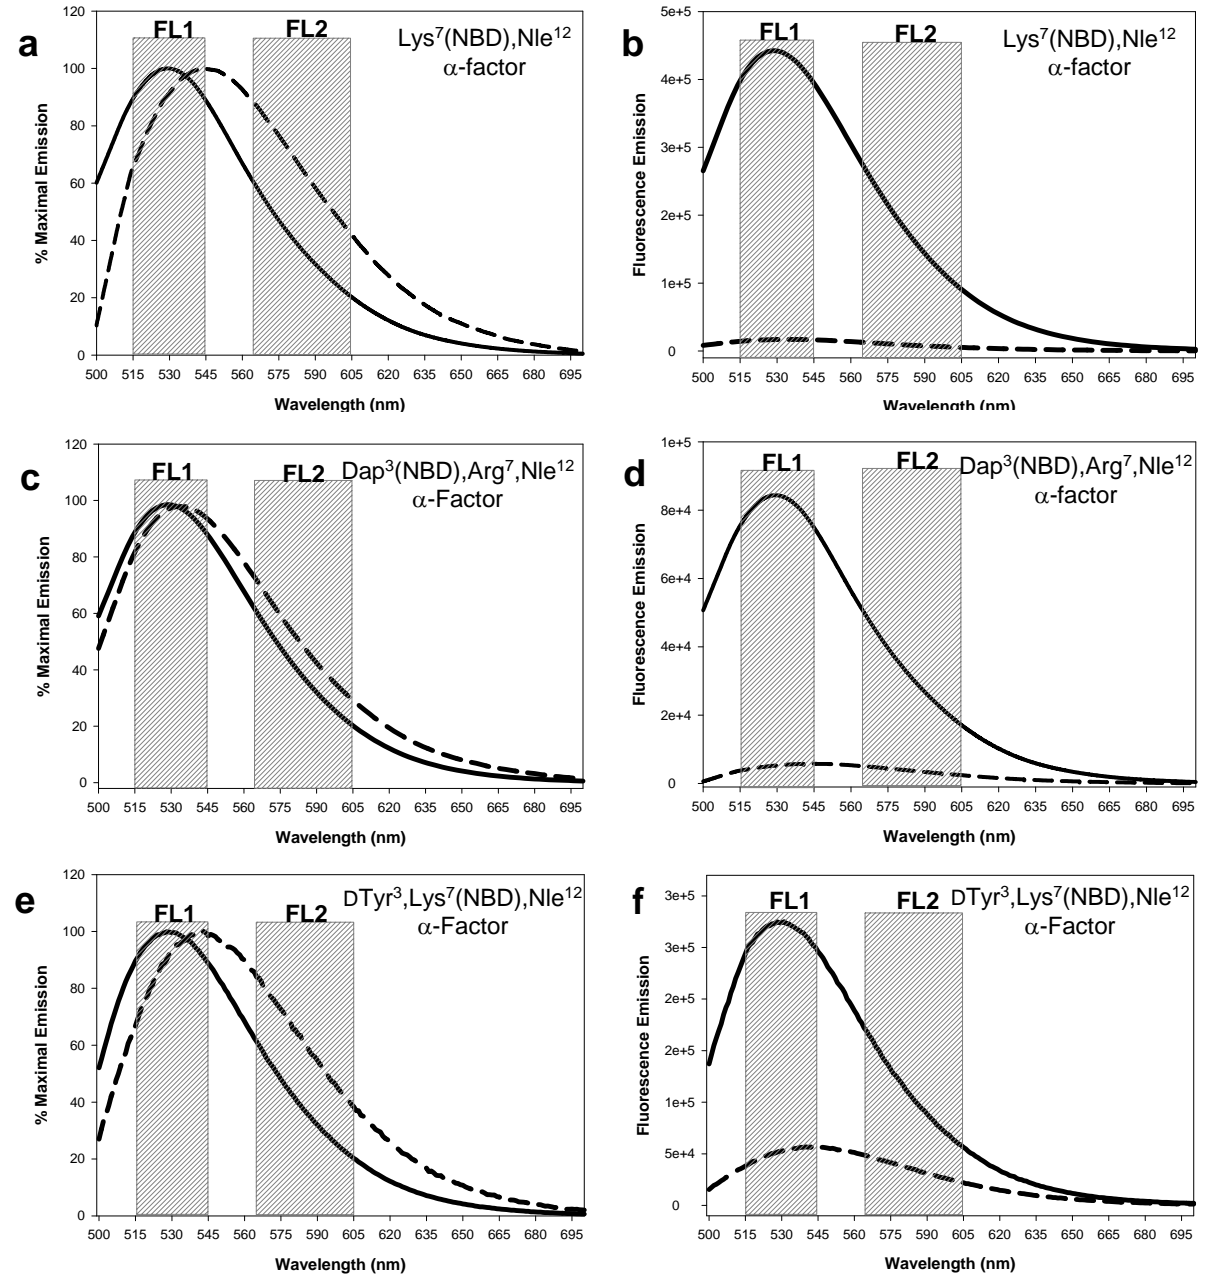

**Supplementary Fig. 2.** Dot plots of fluorescence emission intensity in the FL1 (x-axis) and FL2 (y-axis) channels for the four libraries bound to a sub-saturating (50nM) concentration of [Lys<sup>7</sup>(NBD),Nle<sup>12</sup>] a-factor. Each dot plot is based on cytometry of 10,000 cells. Plots are shown for cell expressing un-mutagenized receptors (WT), for cells expressing libraries mutagenized in the four indicated regions of the receptor, and for *ste2*- $\Delta$  cells transformed with an empty vector. The arrow in the N-terminal region panel points out cells exhibiting the “mutant phenotype”, of an increase FL2/FL1 ratio compared to unmutagenized receptors.

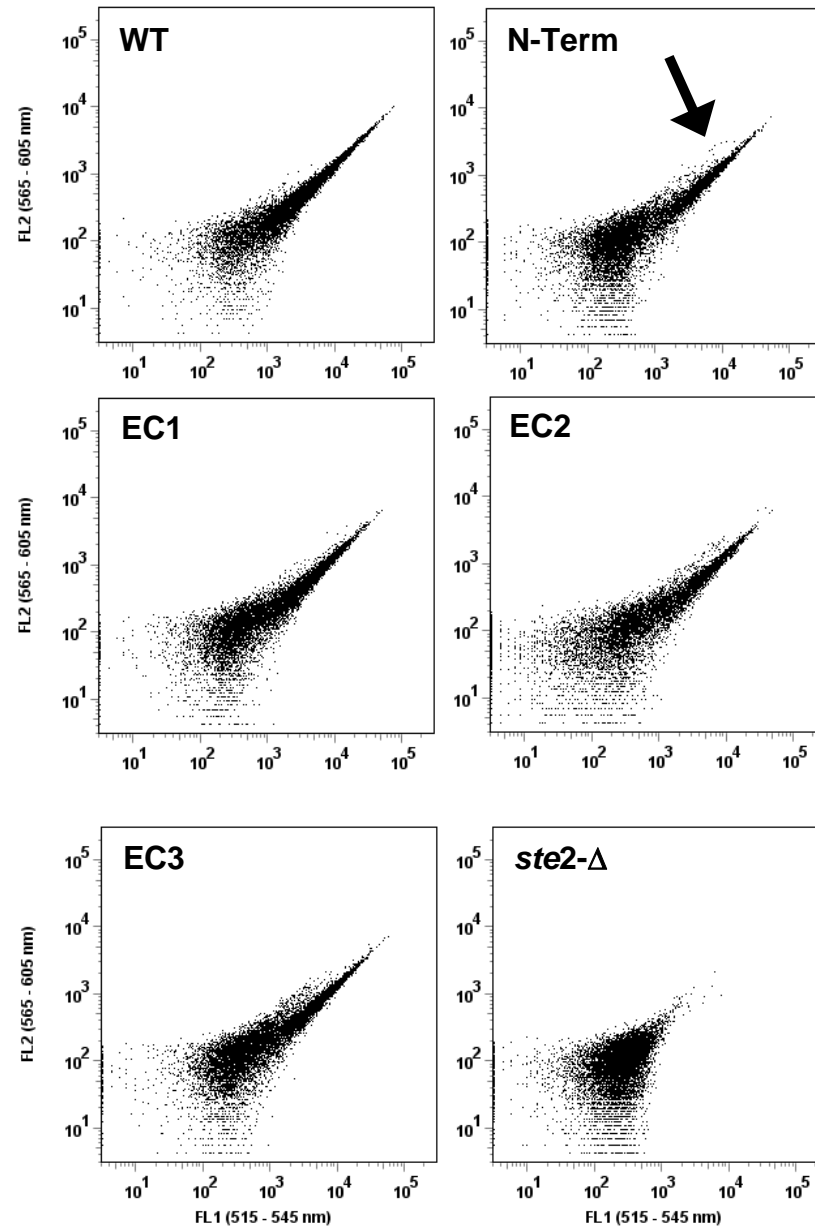

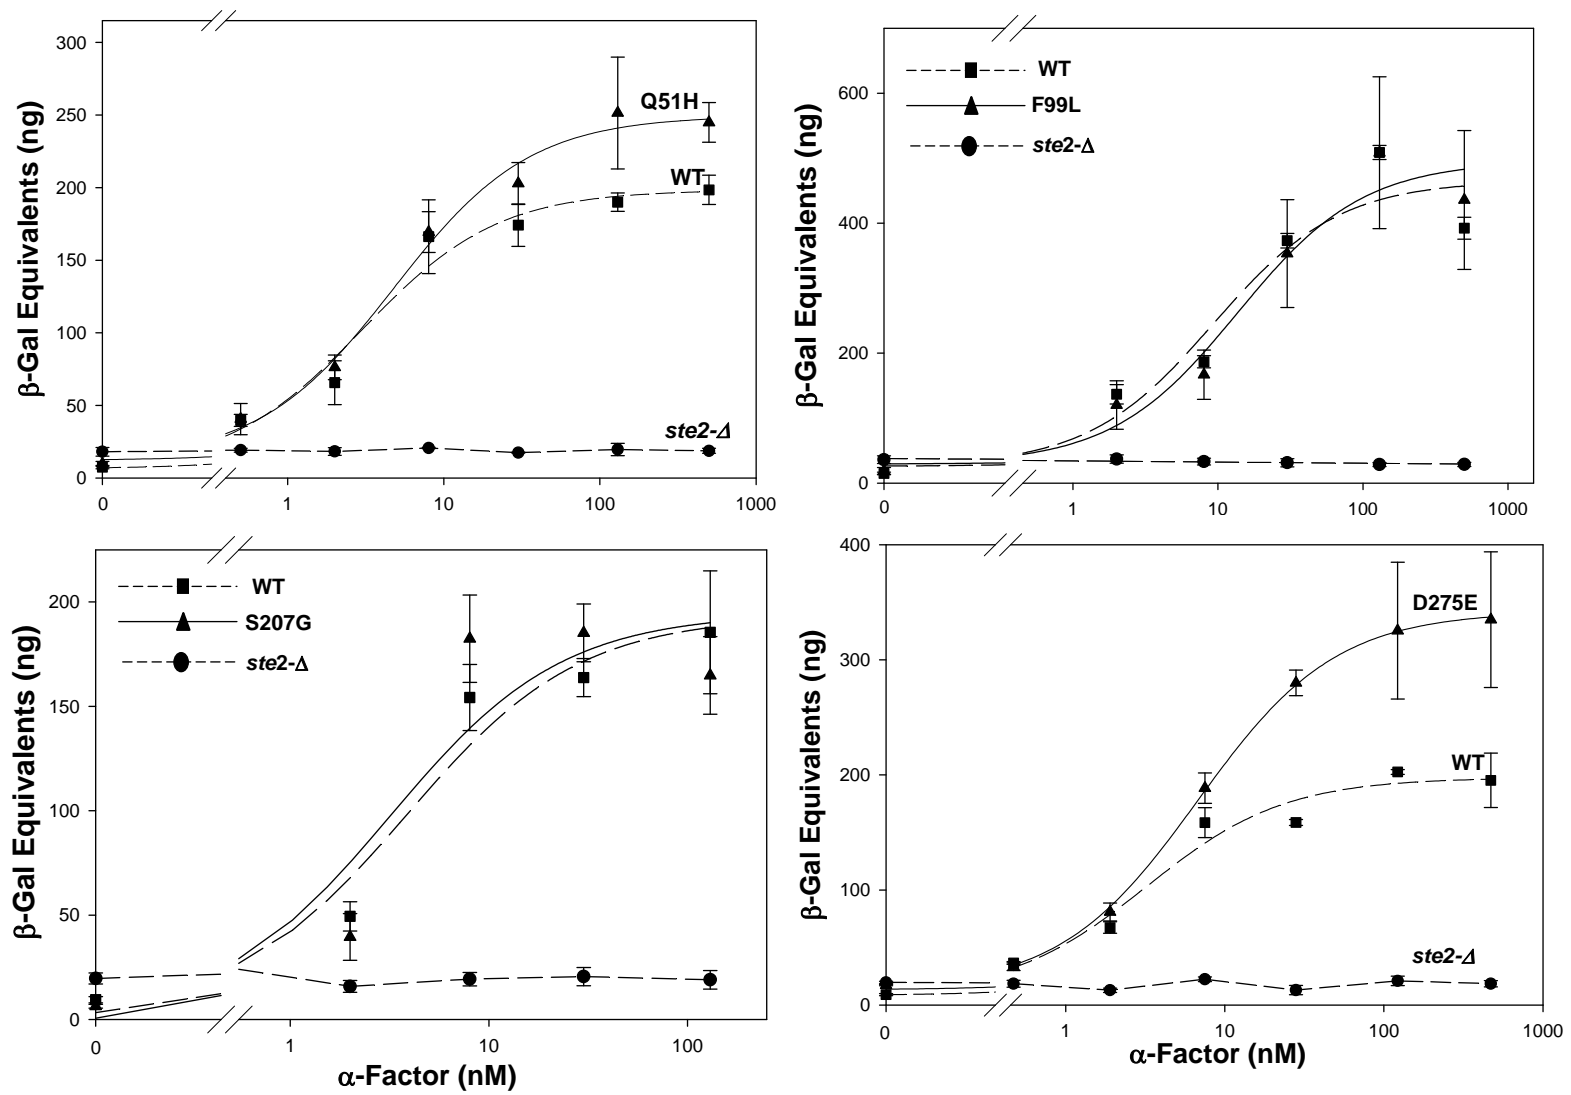

**Supplementary Fig. 3.** Induction of *FUS1-lacZ* reporter in response to  $\alpha$ -factor by representative mutant and normal receptor alleles.

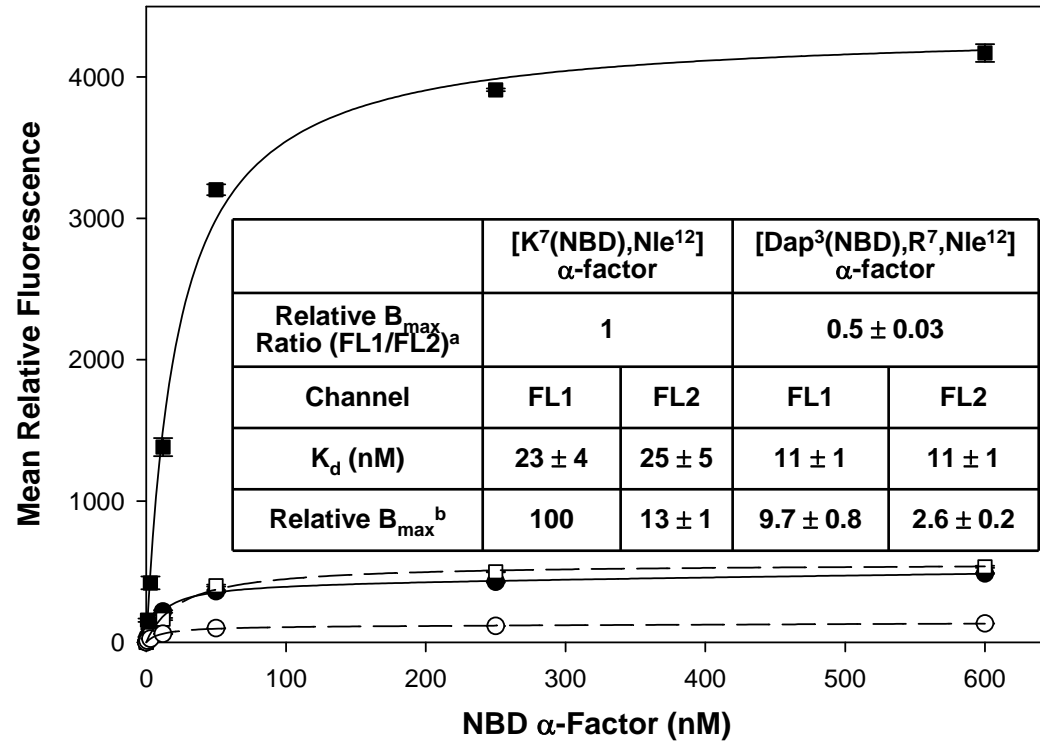

**Supplementary Fig. 4:** Comparison of the binding curves of [Dap<sup>3</sup>(NBD),Arg<sup>7</sup>,Nle<sup>12</sup>] α-factor and [Lys<sup>7</sup>(NBD),Nle<sup>12</sup>] α-factor bound to Ste2p. The squares (■ □) represent the WT strain bound to [Lys<sup>7</sup>(NBD),Nle<sup>12</sup>] α-factor and the circles (● ○) represent binding of the same strain to [Dap<sup>3</sup>(NBD),Arg<sup>7</sup>,Nle<sup>12</sup>] α-factor. The closed symbols/unbroken lines and open symbols/broken lines indicate information obtained from the FL1 and FL2 channels, respectively. <sup>a</sup>Normalized to the ratio for [Lys<sup>7</sup>(NBD),Nle<sup>12</sup>] α-factor bound to wild-type Ste2p. <sup>b</sup>Normalized to the B<sub>max</sub> in FL1 for [Lys<sup>7</sup>(NBD),Nle<sup>12</sup>] α-factor bound to wild-type Ste2p.

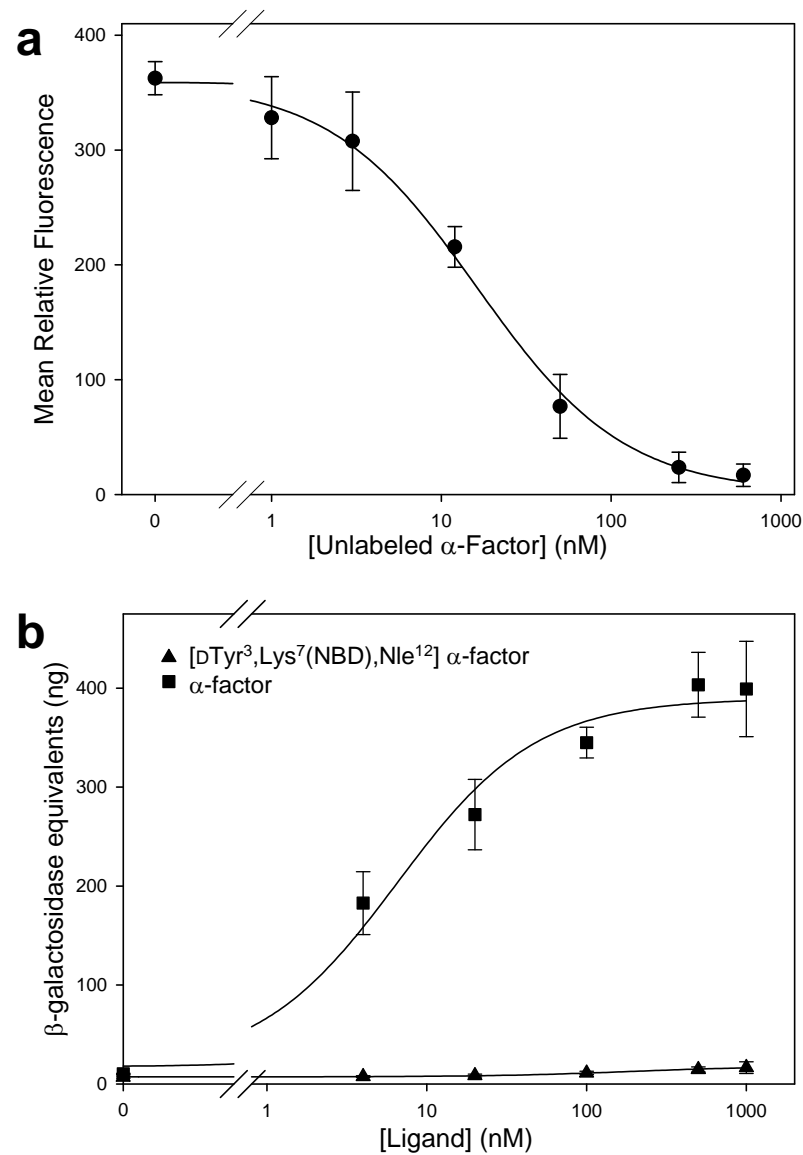

**Supplementary Fig. 5. a.** Inhibition of the binding of the fluorescent antagonist [D-Tyr<sup>3</sup>,Lys<sup>7</sup>(NBD),Nle<sup>12</sup>]  $\alpha$ -factor to Ste2p by  $\alpha$ -factor. All experiments used yeast strain A3694, expressing Ste2p  $\Delta$ 305-431 from a multicopy plasmid. The concentration of the labeled antagonist was held constant at 6 nM. The curve shows a fit to 1-site competitive binding with an IC<sub>50</sub> of 16 nM. **b.** Comparison of activation of the *FUS1*-LacZ reporter of pheromone response by normal  $\alpha$ -factor and the antagonist [D-Tyr<sup>3</sup>,Lys<sup>7</sup>(NBD),Nle<sup>12</sup>]  $\alpha$ -factor.

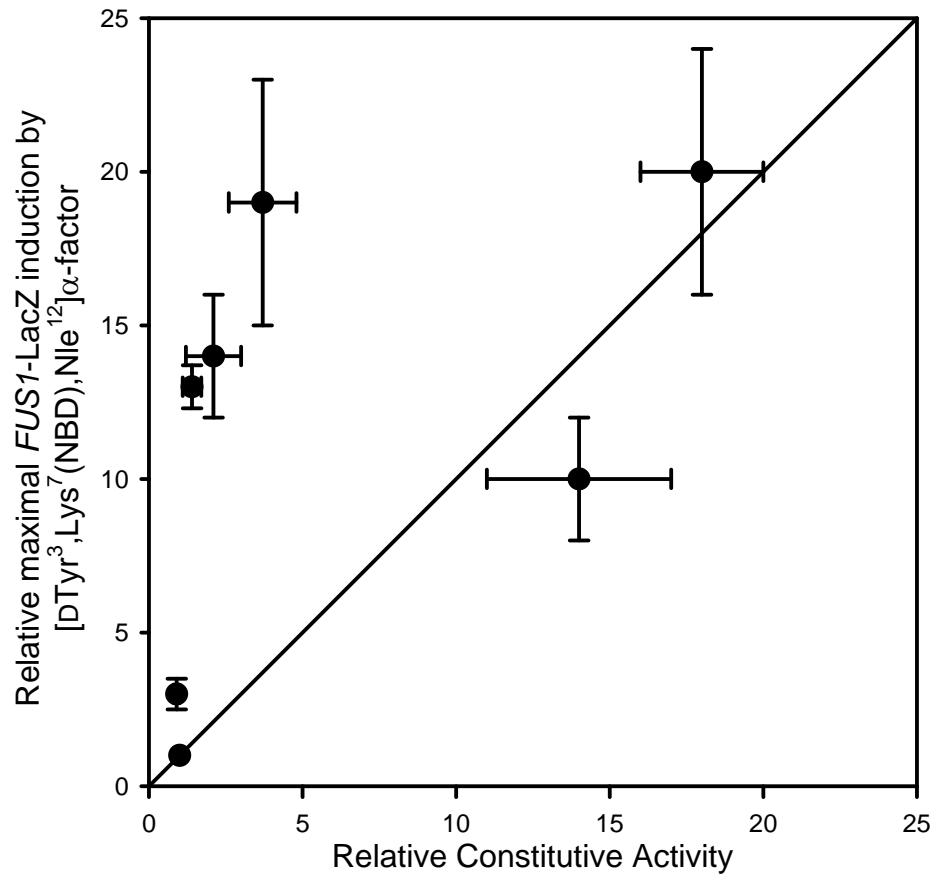

**Supplementary Fig. 6.** Correlation of maximal signaling (induction of *FUS1*-LacZ reporter) versus relative constitutive activity of mutant receptor alleles that shift the emission of bound [pTyr<sup>3</sup>,Lys<sup>7</sup>(NBD),Nle<sup>12</sup>]α-factor (from Table 4). A line with a slope of 1 is shown for reference.
